S3 Table. Experimental corpus of fluted points used in this study

| N°                                          | date | R.M. | H.T. | Shap. | Fl. T | Tool | Hold. | Fl. org. | C-F nbr. | Fgts nbr. | Lack | C-F Acc. | C-F dist.prof. | Butt | Bulb | Lip | Bb. sc. | Rip. Am. C-F | Rip. Loc. C-F | Edg. Par. C-F | Edg. Reg. C-F | C-F ov.fl. | F.P. Acc. | I. F.P mm | w. F.P mm | th. F.P mm | Fl. I. mm | Fl. Lght % | I. C-F mm | w. C-F mm | th. C-F mm | observations / remarks |
|---------------------------------------------|------|------|------|-------|-------|------|-------|----------|----------|-----------|------|----------|----------------|------|------|-----|---------|--------------|---------------|---------------|---------------|------------|-----------|-----------|-----------|------------|-----------|------------|-----------|-----------|------------|------------------------|
| <b>1 pressure</b>                           |      |      |      |       |       |      |       |          |          |           |      |          |                |      |      |     |         |              |               |               |               |            |           |           |           |            |           |            |           |           |            |                        |
| FLU-1                                       | 2013 | 1    | 0    | 1     | 1     | 1    | 3     | 1        | 1        | 4         | 4    | 4        | 3              | 2    | 2    | 1   | 1       | 1            | 3             | 1             | 2             | 0          | 0         | 40        | 18,6      | 6,3        | 40        | 100        | 43,30     | 10,90     | 2,16       |                        |
| FLU-2                                       | 2013 | 1    | 0    | 1     | 1     | 1    | 3     | 1        | 1        | 2         | 3    | 4        | 3              | 2    | 2    | 1   | 1       | 1            | 3             | 2             | 1             | 0          | 0         | 41,2      | 15,5      | 6          | 41,2      | 100        | 36,20     | 10,80     | 2,60       |                        |
| FLU-3                                       | 2013 | 2    | 1    | 1     | 1     | 2    | 3     | 1        | 1        | 4         | 0    | 0        | 1              | 2    | 2    | 1   | 1       | 1            | 3             | 2             | 1             | 0          | 0         | 50,6      | 14,7      | 10,7       | 32,4      | 64         | 28,64     | 5,64      | 1,20       |                        |
| FLU-4                                       | 2013 | 2    | 1    | 1     | 1     | 2    | 3     | 1        | 1        | 3         | 0    | 0        | 1              | 2    | 2    | 1   | 1       | 1            | 3             | 2             | 1             | 0          | 0         | 55        | 15,2      | 8,1        | 43,4      | 79         | 43,00     | 9,08      | 1,28       |                        |
| FLU-5                                       | 2013 | 1    | 1    | 1     | 1     | 3    | 4     | 1        | 1        | 5         | 0    | 6        | 1              | 2    | 1    | 2   | 1       | 1            | 3             | 2             | 3             | 0          | 0         | 74,6      | 17,5      | 9,2        | 74,6      | 100        | 73,34     | 13,21     | 2,42       |                        |
| FLU-6                                       | 2013 | 9    | 1    | 1     | 1     | 3    | 4     | 1        | 1        | 3         | 0    | 4        | 3              | 4    | 2    | 1   | 1       | 2            | 3             | 1             | 1             | 0          | 0         | 65,4      | 17,9      | 8          | 65,4      | 100        | 69,17     | 11,52     | 2,81       |                        |
| FLU-7                                       | 2013 | 3    | 1    | 1     | 1     | 3    | 4     | 1        | 1        | 3         | 0    | 5        | 4              | 0    | 0    | 0   | 0       | 2            | 3             | 3             | 1             | 0          | 1         | 61,13     | 16,8      | 8,8        | 0         | 0          |           |           |            |                        |
| FLU-8                                       | 2013 | 3    | 1    | 1     | 1     | 3    | 4     | 2        | 1        | 3         | 2    | 2        | 2              | 2    | 1    | 2   | 1       | 2            | 3             | 2             | 2             | 0          | 3         | 59,4      | 19,5      | 7,2        | 24,4      | 41         |           |           |            | double fluting         |
| FLU-8-CF2                                   | 2013 | 3    | 1    | 1     | 1     | 3    | 4     | 2        | 1        | 3         | 4    | 2        | 2              | 2    | 2    | 2   | 1       | 1            | 3             | 3             | 1             | 0          |           | 59,4      | 19,5      | 7,2        | 35,5      | 60         |           |           |            |                        |
| FLU-9                                       | 2013 | 3    | 1    | 1     | 1     | 3    | 4     | 1        | 1        | 3         | 0    | 5        | 4              | 1    | 2    | 2   | 1       | 0            | 0             | 3             | 1             | 0          | 1         | 66        | 16,35     | 6,7        | 0         | 0          |           |           |            |                        |
| FLU-10                                      | 2013 | 3    | 1    | 1     | 1     | 3    | 4     | 1        | 1        | 4         | 0    | 2        | 2              | 1    | 2    | 1   | 1       | 1            | 3             | 1             | 1             | 0          | 0         | 73,1      | 19,4      | 6,7        | 46,6      | 64         |           |           |            |                        |
| FLU-11                                      | 2013 | 3    | 1    | 1     | 1     | 3    | 4     | 2        | 1        | 2         | 1    | 2        | 2              | 0    | 0    | 0   | 0       | 3            | 3             | 1             | 1             | 0          | 2         | 64,6      | 18,6      | 8          | 24,8      | 38         |           |           |            | double fluting         |
| FLU-11-CF2                                  | 2013 | 3    | 1    | 1     | 1     | 3    | 4     | 2        | 1        | 2         | 1    | 2        | 2              | 0    | 0    | 0   | 0       | 1            | 3             | 1             | 1             | 0          |           | 64,6      | 18,6      | 8          | 34,8      | 54         |           |           |            |                        |
| FLU-12                                      | 2013 | 4    | 1    | 1     | 1     | 3    | 4     | 1        | 1        | 4         | 0    | 4        | 3              | 0    | 0    | 0   | 0       | 1            | 3             | 1             | 1             | 0          | 0         | 35,5      | 17,6      | 5,7        | 35,5      | 100        | 35,98     | 8,25      | 1,49       |                        |
| FLU-13                                      | 2013 | 5    | 1    | 1     | 1     | 3    | 4     | 1        | 3        | 8         | 0    | 5        | 4              | 1    | 2    | 1   | 1       | 2            | 3             | 3             | 1             | 0          | 1         | 58,6      | 15,6      | 6,2        | 0         | 0          |           |           |            |                        |
| FLU-14                                      | 2013 | 6    | 1    | 1     | 1     | 3    | 3     | 1        | 1        | 3         | 3    | 3        | 2              | 3    | 2    | 1   | 2       | 1            | 4             | 1             | 1             | 0          | 0         | 76,1      | 17,9      | 7,7        | 66,66     | 88         | 59,18     | 9,20      | 1,39       |                        |
| FLU-15                                      | 2013 | 7    | 1    | 1     | 1     | 3    | 3     | 3        | 1        | 1         | 0    | 0        | 1              | 1    | 2    | 1   | 1       | 1            | 4             | 2             | 1             | 0          | 0         | 48,8      | 16,9      | 7,4        | 17,6      | 36         | 29,00     | 6,40      | 1,36       | quadruple fluting      |
| FLU-15-CF2                                  | 2013 | 7    | 1    | 1     | 1     | 3    | 3     | 3        | 1        | 2         | 0    | 0        | 1              | 1    | 2    | 1   | 1       | 1            | 3             | 2             | 1             | 0          |           | 48,8      | 16,9      | 7,4        | 18,2      | 37         | 22,58     | 6,09      | 1,05       |                        |
| FLU-15-CF3                                  | 2013 | 7    | 1    | 1     | 1     | 3    | 3     | 3        | 1        | 1         | 3    | 0        | 1              | 1    | 2    | 1   | 1       | 1            | 3             | 2             | 1             | 0          |           | 48,8      | 16,9      | 7,4        | 21        | 43         | 18,37     | 4,88      | 1,49       |                        |
| FLU-15-CF4                                  | 2013 | 7    | 1    | 1     | 1     | 3    | 3     | 3        | 1        | 2         | 0    | 0        | 1              | 1    | 2    | 1   | 1       | 1            | 3             | 2             | 1             | 0          |           | 48,8      | 16,9      | 7,4        | 29,4      | 60         | 20,86     | 6,73      | 1,15       |                        |
| FLU-16                                      | 2013 | 4    | 1    | 1     | 1     | 3    | 4     | 1        | 1        | 6         | 0    | 2        | 2              | 1    | 2    | 2   | 1       | 0            | 0             | 1             | 1             | 0          | 7         | 42,5      | 16,8      | 7          | 28        | 66         | 28,30     | 7,18      | 1,06       |                        |
| <b>2 direct percussion using soft stone</b> |      |      |      |       |       |      |       |          |          |           |      |          |                |      |      |     |         |              |               |               |               |            |           |           |           |            |           |            |           |           |            |                        |
| FLU-17                                      | 2013 | 8    | 1    | 1     | 2     | 5    | 1     | 1        | 1        | 0         | 0    | 3        | 5              | 1    | 2    | 1   | 1       | 2            | 3             | 4             | 2             | 0          | 0         | 82,4      | 20,2      | 15,6       | 51        | 62         | 50,71     | 19,93     | 3,40       |                        |
| FLU-18                                      | 2013 | 7    | 0    | 1     | 2     | 5    | 1     | 1        | 1        | 0         | 0    | 0        | 1              | 1    | 2    | 1   | 2       | 1            | 3             | 3             | 2             | 0          | 0         | 66,3      | 17,6      | 11,8       | 17,8      | 27         |           |           |            |                        |
| FLU-19                                      | 2013 | 7    | 0    | 1     | 2     | 5    | 1     | 2        | 1        | 1         | 0    | 1        | 2              | 2    | 2    | 1   | 1       | 1            | 4             | 3             | 2             | 1          | 3         | 47        | 15,7      | 10,2       | 11        | 23         |           |           |            | double fluting         |
| FLU-19-CF2                                  | 2013 | 7    | 0    | 1     | 2     | 5    | 1     | 2        | 1        | 1         | 0    | 2        | 2              | 1    | 2    | 1   | 1       | 0            | 0             | 1             | 1             | 2          |           | 47        | 15,7      | 10,2       | 21,3      | 45         |           |           |            |                        |
| FLU-20                                      | 2013 | 7    | 0    | 1     | 2     | 5    | 1     | 1        | 1        | 2         | 3    | 2        | 2              | 1    | 2    | 1   | 1       | 2            | 3             | 1             | 2             | 0          | 0         | 61,5      | 17        | 7,4        | 34,5      | 56         |           |           |            |                        |
| FLU-21                                      | 2013 | 1    | 0    | 1     | 2     | 5    | 1     | 1        | 1        | 0         | 0    | 0        | 1              | 2    | 3    | 2   | 1       | 1            | 3             | 1             | 2             | 0          | 0         | 54,1      | 19,1      | 6,9        | 33        | 61         |           |           |            |                        |
| FLU-22                                      | 2013 | 7    | 0    | 1     | 2     | 5    | 1     | 2        | 1        | 2         | 0    | 2        | 2              | 4    | 1    | 1   | 2       | 1            | 3             | 1             | 2             | 0          | 3         | 70,5      | 18,2      | 9,8        | 33        | 47         |           |           |            | double fluting         |
| FLU-22-CF2                                  | 2013 | 7    | 0    | 1     | 2     | 5    | 1     | 2        | 1        | 2         | 0    | 2        | 2              | 1    | 2    | 1   | 1       | 1            | 3             | 4             | 3             | 0          | 2         | 70,5      | 18,2      | 9,8        | 28,8      | 41         |           |           |            |                        |
| FLU-23                                      | 2013 | 1    | 0    | 1     | 2     | 6    | 1     | 2        | 1        | 1         | 0    | 1        | 2              | 3    | 2    | 1   | 1       | 0            | 0             | 3             | 2             | 2          | 1         | 54        | 14        | 9          | 0         | 0          |           |           |            | double fluting         |
| FLU-23-CF2                                  |      | 1    | 0    | 1     | 2     | 6    | 1     | 2        | 1        | 1         | 0    | 5        | 4              | 2    | 1    | 2   | 1       | 0            | 0             | 1             | 1             | 0          |           | 54        | 14        | 9          | 14,8      | 27         |           |           |            |                        |
| FLU-24                                      | 2013 | 1    | 0    | 1     | 2     | 6    | 1     | 2        | 1        | 1         | 0    | 2        | 2              | 2    | 2    | 1   | 1       | 1            | 3             | 2             | 2             | 0          | 3         | 46,3      | 16,1      | 8,3        | 26,9      | 58         |           |           |            | double fluting         |
| FLU-24-CF2                                  | 2013 | 1    | 0    | 1     | 2     | 6    | 1     | 2        | 1        | 1         | 0    | 2        | 2              | 1    | 2    | 1   | 2       | 0            | 0             | 3             | 1             | 0          |           | 46,3      | 16,1      | 8,3        | 17,3      | 37         |           |           |            |                        |
| FLU-25                                      | 2013 | 1    | 0    | 1     | 2     | 6    | 1     | 1        | 1        | 0         | 0    | 1        | 2              | 2    | 2    | 1   | 1       | 0            | 0             | 3             | 1             | 0          | 2         | 53,4      | 14,7      | 8,2        | 18,4      | 34         |           |           |            |                        |
| FLU-26                                      | 2013 | 5    | 1    | 1     | 2     | 6    | 1     | 2        | 1        | 2         | 0    | 1        | 2              | 1    | 1    | 1   | 1       | 1            | 3             | 1             | 2             | 0          | 2         | 64,6      | 15,1      | 8,2        | 11,4      | 18         |           |           |            | double fluting         |
| FLU-26-CF2                                  | 2013 | 5    | 1    | 1     | 2     | 6    | 1     | 2        | 1        | 1         | 0    | 2        | 2              | 3    | 2    | 1   | 1       | 0            | 0             | 3             | 2             | 0          |           | 64,6      | 15,1      | 8,2        | 24,4      | 38         |           |           |            |                        |
| FLU-27                                      | 2013 | 2    | 0    | 1     | 2     | 6    | 1     | 2        | 1        | 2         | 1    | 1        | 2              | 0    | 0    | 0   | 0       | 0            | 0             | 1             | 1             | 0          | 2         | 48,6      | 14        | 6,5        | 12,5      | 26         |           |           |            | double fluting         |
| FLU-27-CF2                                  | 2013 | 2    | 0    | 1     | 2     | 6    | 1     | 2        | 1        | 0         | 4    | 1        | 2              | 3    | 2    | 1   | 1       | 0            | 0             | 1             | 2             | 0          |           | 48,6      | 14        | 6,5        | 8,2       | 17         |           |           |            |                        |
| FLU-28                                      | 2013 | 1    | 0    | 1     | 2     | 6    | 1     | 2        | 1        | 1         | 0    | 1        | 2              | 4    | 2    | 1   | 1       | 0            | 0             | 3             | 1             | 0          | 3         | 41,6      | 15,2      | 6,9        | 11,2      | 27         |           |           |            | double fluting         |
| FLU-28-CF2                                  | 2013 | 1    | 0    | 1     | 2     | 6    | 1     | 2        | 1        | 1         | 0    | 0        | 1              | 3    | 3    | 1   | 1       | 1            | 3             | 1             | 2             | 0          |           | 41,6      | 15,2      | 6,9        | 25,5      | 61         |           |           |            |                        |
| FLU-29                                      | 2013 | 6    | 1    | 1     | 2     | 6    | 1     | 1        | 1        | 3         | 1    | 5        | 4              | 0    | 0    | 0   | 0       | 3            | 3             | 3             | 2             | 0          | 1         | 47,9      | 16,3      | 6,8        | 0         | 0          |           |           |            |                        |
| FLU-30                                      | 2013 | 10   | 1    | 1     | 2     | 6    | 1     | 1        | 1        | 0         | 0    | 2        | 5              | 1    | 2    | 1   | 1       | 0            | 0             | 4             | 2             | 0          | 2         | 66,5      | 18,4      | 16         | 46,3      | 70         |           |           |            |                        |
| FLU-31                                      | 2013 | 7    | 1    | 1     | 2     | 6    | 1     | 2        | 1        | 1         | 0    | 2        | 2              | 1    | 2    | 1   | 1       | 1            | 3             | 4             | 3             | 0          | 2         | 34,4      | 12,4      | 7          | 21,4      | 62         |           |           |            | double fluting         |
| FLU-31-CF2                                  | 2013 | 7    | 1    | 1     | 2     | 6    | 1     | 2        | 1        | 1         | 0    | 5        | 4              | 1    | 2    | 1   | 1       | 0            | 0             | 3             | 2             | 1          | 1         | 34,4      | 12,4      | 7          | 0         | 0          |           |           |            |                        |
| FLU-32                                      | 2013 | 5    | 1    | 1     | 2     | 6    | 1     | 2        | 1        | 1         | 0    | 2        | 2              | 2    | 2    | 1   | 1       | 1            | 3             | 1             | 2             | 0          | 3         | 52,4      | 17,3      | 11,9       | 23,8      | 45         |           |           |            | double fluting         |
| FLU-32-CF2                                  | 2013 | 5    | 1    | 1     | 2     | 6    | 1     | 2        | 1        | 1         | 3    | 2        | 2              | 1    | 2    | 2   | 1       | 1            | 3             | 1             | 2             | 0          |           | 52,4      | 17,3      | 11,9       | 20,6      | 39         |           |           |            |                        |

|             |            |    |   |   |   |    |   |   |   |   |   |   |   |   |   |   |   |   |   |   |   |   |   |       |       |       |       |    |       |       |      |                              |
|-------------|------------|----|---|---|---|----|---|---|---|---|---|---|---|---|---|---|---|---|---|---|---|---|---|-------|-------|-------|-------|----|-------|-------|------|------------------------------|
| FLU-33      | 2013       | 6  | 1 | 1 | 2 | 6  | 1 | 2 | 1 | 1 | 0 | 2 | 2 | 4 | 2 | 1 | 1 | 0 | 0 | 2 | 2 | 0 | 3 | 37,8  | 16,2  | 8,3   | 17,5  | 46 |       |       |      | triple fluting               |
| FLU-33-CF2  | 2013       | 6  | 1 | 1 | 2 | 6  | 1 | 2 | 1 | 1 | 3 | 1 | 2 | 1 | 2 | 1 | 1 | 0 | 0 | 1 | 2 | 0 |   | 37,8  | 16,2  | 8,3   | 12,7  | 34 |       |       |      |                              |
| FLU-33-CF3  | 2013       | 6  | 1 | 1 | 2 | 6  | 1 | 2 | 1 | 1 | 0 | 2 | 2 | 1 | 2 | 1 | 1 | 1 | 3 | 4 | 3 | 0 |   | 37,8  | 16,2  | 8,3   | 19    | 50 |       |       |      |                              |
| FLU-34      | 2013       | 1  | 0 | 1 | 2 | 9  | 1 | 1 | 1 | 0 | 0 | 2 | 2 | 4 | 2 | 1 | 1 | 1 | 3 | 1 | 3 | 1 | 2 | 53,4  | 11    | 9,5   | 0     | 0  |       |       |      | triheral shaping on fracture |
| FLU-35      | 2015       | 5  | 1 | 1 | 2 | 6  | 1 | 2 | 1 | 1 | 0 | 2 | 2 | 2 | 2 | 1 | 1 | 0 | 0 | 3 | 2 | 0 | 0 | 57,6  | 22,3  | 12    | 28,3  | 49 |       |       |      | double fluting               |
| FLU-35-CF2  | 2015       | 5  | 1 | 1 | 2 | 6  | 1 | 2 | 1 | 1 | 0 | 0 | 1 | 1 | 2 | 1 | 1 | 1 | 3 | 3 | 2 | 0 |   | 57,6  | 22,3  | 12    | 32,4  | 56 |       |       |      |                              |
| FLU-36      | 2015       | 5  | 1 | 1 | 2 | 6  | 1 | 2 | 1 | 1 | 0 | 3 | 2 | 2 | 3 | 1 | 1 | 1 | 3 | 1 | 3 | 0 | 3 | 53    | 19,4  | 12,6  | 31,1  | 59 |       |       |      | double fluting               |
| FLU-36-CF2  | 2015       | 5  | 1 | 1 | 2 | 6  | 1 | 2 | 1 | 2 | 4 | 1 | 2 | 3 | 1 | 1 | 1 | 0 | 0 | 1 | 2 | 0 |   | 53    | 19,4  | 12,6  | 20,5  | 39 |       |       |      |                              |
| FLU-37      | 2015       | 6  | 1 | 1 | 2 | 7  | 1 | 1 | 1 | 0 | 0 | 5 | 4 | 2 | 2 | 1 | 1 | 3 | 3 | 3 | 3 | 0 | 1 | 79    | 25,15 | 15,6  | 0     | 0  |       |       |      |                              |
| FLU-38      | 2015       | 3  | 1 | 1 | 2 | 8  | 2 | 1 | 1 | 0 | 0 | 2 | 2 | 2 | 2 | 1 | 2 | 0 | 0 | 4 | 3 | 0 | 4 | 61,5  | 23,9  | 10,7  | 34    | 55 |       |       |      |                              |
| FLU-39      | 2015       | 5  | 1 | 1 | 2 | 8  | 1 | 1 | 1 | 3 | 0 | 3 | 5 | 2 | 2 | 1 | 1 | 3 | 3 | 4 | 3 | 0 | 2 | 65,5  | 21,5  | 11,7  | 48,1  | 73 | 49,49 | 16,38 | 3,01 |                              |
| FLU-40      | 2015       | 5  | 1 | 1 | 2 | 8  | 1 | 1 | 1 | 0 | 0 | 3 | 5 | 2 | 2 | 1 | 1 | 3 | 3 | 1 | 3 | 0 | 2 | 69,2  | 23    | 12,8  | 55,6  | 80 |       |       |      |                              |
| FLU-41      | 2015       | 5  | 1 | 1 | 2 | 8  | 1 | 1 | 1 | 2 | 0 | 5 | 4 | 1 | 2 | 2 | 1 | 0 | 0 | 3 | 2 | 0 | 1 | 50,1  | 19,6  | 11    | 0     | 0  |       |       |      |                              |
| FLU-42      | 2015       | 3  | 1 | 1 | 2 | 8  | 1 | 1 | 1 | 0 | 0 | 2 | 2 | 1 | 2 | 1 | 1 | 2 | 3 | 4 | 2 | 0 | 2 | 79,2  | 20,3  | 9,6   | 49,2  | 62 |       |       |      |                              |
| FLU-43      | 2015       | 5  | 1 | 1 | 2 | 8  | 1 | 1 | 1 | 0 | 0 | 5 | 4 | 4 | 2 | 1 | 1 | 0 | 0 | 3 | 1 | 0 | 1 | 57,1  | 16,5  | 10,8  | 0     | 0  |       |       |      |                              |
| FLU-44      | 2015       | 3  | 1 | 1 | 2 | 10 | 1 | 1 | 1 | 0 | 0 | 5 | 4 | 1 | 2 | 1 | 1 | 2 | 3 | 3 | 2 | 0 | 1 | 70,6  | 23,9  | 12,6  | 0     | 0  |       |       |      |                              |
| FLU-45      | 18/06/2015 | 6  | 1 | 1 | 2 | 11 | 2 | 2 | 1 | 1 | 0 | 2 | 2 | 4 | 2 | 1 | 1 | 1 | 3 | 4 | 2 | 0 | 0 | 58,4  | 25,2  | 10,4  | 37,9  | 65 |       |       |      | quadruple fluting            |
| FLU-45-CF2  | 18/06/2015 | 6  | 1 | 1 | 2 | 11 | 2 | 2 | 1 | 1 | 0 | 0 | 1 | 0 | 0 | 0 | 0 | 0 | 0 | 1 | 1 | 0 |   | 58,4  | 25,2  | 10,4  | 24    | 41 |       |       |      |                              |
| FLU-45-CF3  | 18/06/2015 | 6  | 1 | 1 | 2 | 11 | 2 | 2 | 1 | 1 | 0 | 0 | 0 | 4 | 2 | 1 | 1 | 0 | 0 | 1 | 3 | 0 |   | 58,4  | 25,2  | 10,4  | 27,3  | 47 |       |       |      |                              |
| FLU-45-CF4  | 18/06/2015 | 6  | 1 | 1 | 2 | 11 | 2 | 2 | 1 | 1 | 0 | 0 | 1 | 1 | 2 | 1 | 1 | 0 | 0 | 3 | 2 | 0 |   | 58,4  | 25,2  | 10,4  | 32,8  | 56 |       |       |      |                              |
| FLU-101     | 2018       | 3  | 1 | 1 | 2 | 10 | 1 | 1 | 1 | 1 | 0 | 0 | 5 | 2 | 2 | 2 | 1 | 1 | 3 | 1 | 1 | 0 | 0 | 77,02 | 22,75 | 18,18 | 47,05 | 61 | 47,05 | 17,53 | 4,43 |                              |
| FLU-102     | 2018       | 3  | 1 | 1 | 2 | 10 | 1 | 1 | 1 | 1 | 0 | 0 | 1 | 1 | 2 | 1 | 1 | 2 | 4 | 2 | 3 | 0 | 0 | 64,52 | 21,65 | 19,78 | 49,67 | 77 | 49,67 | 14,78 | 3,51 |                              |
| FLU-103     | 2018       | 5  | 1 | 1 | 2 | 10 | 1 | 1 | 1 | 2 | 0 | 0 | 5 | 2 | 1 | 1 | 1 | 1 | 3 | 1 | 2 | 1 | 0 | 65,4  | 20,87 | 23,31 | 50,93 | 78 | 50,93 | 16,56 | 3,82 |                              |
| FLU-104     | 2018       | 5  | 1 | 1 | 2 | 10 | 1 | 1 | 1 | 2 | 0 | 0 | 1 | 2 | 2 | 1 | 1 | 1 | 3 | 1 | 2 | 0 | 0 | 47,64 | 14,52 | 13,24 | 40,6  | 85 | 40,60 | 11,90 | 2,96 |                              |
| FLU-105     | 2018       | 7  | 1 | 1 | 2 | 10 | 1 | 3 | 2 | 2 | 0 | 3 | 2 | 4 | 1 | 1 | 2 | 1 | 4 | 1 | 1 | 0 | 0 | 45,36 | 18,93 | 7,98  | 29,82 | 66 | 29,82 | 9,36  | 2,13 |                              |
| FLU-105-CF2 | 2018       | 7  | 1 | 1 | 2 | 10 | 1 | 3 | 2 | 2 | 0 | 5 | 4 | 2 | 3 | 1 | 1 | 1 | 2 | 3 | 1 | 0 | 1 | 45,36 | 18,93 | 7,98  | 0     | 0  |       |       |      |                              |
| FLU-106     | 2018       | 4  | 1 | 1 | 2 | 10 | 1 | 1 | 1 | 2 | 0 | 5 | 4 | 3 | 2 | 1 | 1 | 1 | 1 | 3 | 1 | 0 | 1 | 48,95 | 16,36 | 9,46  | 0     | 0  |       |       |      |                              |
| FLU-107     | 2018       | 3  | 1 | 1 | 2 | 10 | 1 | 3 | 2 | 1 | 0 | 0 | 1 | 2 | 3 | 1 | 1 | 0 | 0 | 2 | 2 | 1 | 0 | 58,49 | 13,38 | 12,48 | 27,95 | 48 | 27,95 | 9,72  | 2,21 |                              |
| FLU-107-CF2 | 2018       | 3  | 1 | 1 | 2 | 10 | 1 | 3 | 2 | 1 | 1 | 3 | 2 | 0 | 0 | 0 | 0 | 2 | 4 | 4 | 2 | 0 | 0 | 58,49 | 13,38 | 12,48 | 0     | 0  |       |       |      |                              |
| FLU-107-CF3 | 2018       | 3  | 1 | 1 | 2 | 10 | 1 | 3 | 2 | 2 | 0 | 5 | 4 | 4 | 1 | 1 | 1 | 0 | 0 | 3 | 1 | 0 | 1 | 58,49 | 13,38 | 12,48 | 0     | 0  |       |       |      |                              |
| FLU-108     | 2018       | 5  | 1 | 1 | 2 | 21 | 1 | 1 | 1 | 1 | 0 | 2 | 2 | 2 | 1 | 1 | 2 | 2 | 3 | 3 | 3 | 1 | 2 | 54,83 | 21,7  | 19,56 | 30    | 55 |       |       |      |                              |
| FLU-109     | 2018       | 6  | 1 | 1 | 2 | 22 | 1 | 2 | 1 | 1 | 1 | 3 | 2 | 4 | 2 | 2 | 2 | 1 | 3 | 1 | 1 | 0 | 2 | 58,04 | 20,54 | 13,7  | 26,33 | 45 | 26,33 | 10,36 | 2,19 |                              |
| FLU-109-CF2 | 2018       | 6  | 1 | 1 | 2 | 22 | 1 | 2 | 1 | 1 | 0 | 5 | 4 | 0 | 0 | 0 | 0 | 1 | 4 | 3 | 3 | 0 | 1 | 58,04 | 20,54 | 13,7  | 0     | 0  |       |       |      |                              |
| FLU-110     | 2018       | 16 | 0 | 1 | 2 | 22 | 1 | 1 | 1 | 1 | 0 | 0 | 1 | 2 | 2 | 2 | 1 | 1 | 3 | 1 | 2 | 0 | 0 | 43,88 | 14,59 | 16,52 | 35,04 | 80 | 35,04 | 12,50 | 2,95 |                              |
| FLU-111     | 2018       | 3  | 1 | 1 | 2 | 22 | 1 | 1 | 1 | 2 | 0 | 0 | 5 | 1 | 2 | 1 | 2 | 1 | 3 | 4 | 2 | 0 | 0 | 51,13 | 20,6  | 9,73  | 35,34 | 69 | 35,34 | 12,39 | 3,30 |                              |
| FLU-112     | 2018       | 3  | 1 | 1 | 2 | 22 | 1 | 2 | 2 | 1 | 0 | 0 | 1 | 3 | 3 | 1 | 1 | 1 | 3 | 2 | 1 | 0 | 0 | 54,64 | 23,03 | 14,59 | 31,29 | 57 | 31,29 | 12,74 | 3,09 |                              |
| FLU-112-CF2 | 2018       | 3  | 1 | 1 | 2 | 22 | 1 | 2 | 2 | 1 | 0 | 2 | 2 | 2 | 2 | 2 | 1 | 1 | 3 | 3 | 1 | 1 | 2 | 54,64 | 23,03 | 14,59 | 24,02 | 44 |       |       |      |                              |
| FLU-113     | 2018       | 8  | 1 | 1 | 2 | 22 | 1 | 1 | 1 | 1 | 0 | 2 | 2 | 2 | 1 | 1 | 2 | 1 | 4 | 1 | 1 | 1 | 2 | 45,12 | 20,41 | 9,45  | 27,13 | 60 |       |       |      |                              |
| FLU-114     | 2018       | 3  | 1 | 1 | 2 | 22 | 1 | 1 | 1 | 1 | 0 | 0 | 1 | 4 | 1 | 1 | 1 | 1 | 3 | 1 | 1 | 0 | 0 | 67,82 | 17,66 | 9,83  | 32,8  | 48 | 32,80 | 11,65 | 3,00 |                              |
| FLU-115     | 2018       | 17 | 1 | 1 | 2 | 23 | 1 | 3 | 2 | 1 | 0 | 2 | 2 | 2 | 1 | 1 | 1 | 1 | 3 | 3 | 2 | 0 | 2 | 69,67 | 15,81 | 13,73 | 30,13 | 43 |       |       |      |                              |
| FLU-115-CF2 | 2018       | 17 | 1 | 1 | 2 | 23 | 1 | 3 | 2 | 2 | 0 | 2 | 2 | 2 | 2 | 2 | 1 | 0 | 0 | 3 | 2 | 0 | 2 | 69,67 | 15,81 | 13,73 | 21,23 | 30 |       |       |      |                              |
| FLU-116     | 2018       | 5  | 1 | 1 | 2 | 23 | 1 | 1 | 1 | 4 | 0 | 0 | 1 | 4 | 2 | 1 | 1 | 1 | 3 | 2 | 1 | 0 | 0 | 56,68 | 18,93 | 11,32 | 35,09 | 62 | 35,09 | 11,50 | 1,85 |                              |
| FLU-117     | 2018       | 5  | 1 | 1 | 2 | 23 | 1 | 1 | 1 | 3 | 0 | 0 | 1 | 2 | 2 | 2 | 1 | 1 | 3 | 1 | 1 | 0 | 0 | 51,93 | 23,85 | 10,73 | 45,2  | 87 | 45,20 | 12,77 | 2,20 |                              |
| FLU-118     | 2018       | 5  | 1 | 1 | 2 | 23 | 1 | 1 | 1 | 2 | 0 | 0 | 2 | 1 | 1 | 2 | 1 | 1 | 4 | 1 | 2 | 0 | 0 | 65,5  | 17,81 | 11,61 | 34    | 52 | 33,98 | 10,71 | 1,60 |                              |
| FLU-119     | 2018       | 12 | 1 | 1 | 2 | 23 | 1 | 1 | 1 | 5 | 0 | 5 | 4 | 2 | 2 | 1 | 1 | 1 | 3 | 1 | 1 | 0 | 1 | 82,46 | 20,28 | 12,88 | 0     | 0  |       |       |      |                              |
| FLU-120     | 2018       | 5  | 1 | 1 | 2 | 23 | 1 | 1 | 1 | 2 | 0 | 0 | 1 | 1 | 1 | 1 | 1 | 1 | 3 | 1 | 2 | 0 | 0 | 55,88 | 17,17 | 9,45  | 38,75 | 69 | 38,73 | 10,61 | 2,43 |                              |
| FLU-121     | 2018       | 3  | 1 | 1 | 2 | 23 | 1 | 3 | 2 | 1 | 0 | 0 | 1 |   |   |   |   |   |   |   |   |   |   | 61,76 | 19,69 | 13,03 | 0     |    |       |       |      | direct percussion copper     |
| FLU-121-CF2 | 2018       | 3  | 1 | 1 | 2 | 23 | 1 | 3 | 2 | 2 | 0 | 0 | 1 | 2 | 2 | 2 | 1 | 1 | 4 | 4 | 2 | 0 | 0 | 61,76 | 19,69 | 13,03 | 47,17 | 76 | 47,15 | 12,61 | 2,31 |                              |
| FLU-122     | 2018       | 3  | 1 | 1 | 2 | 23 | 1 | 1 | 1 | 2 | 0 | 0 | 1 | 1 | 3 | 2 | 1 | 1 | 3 | 1 | 1 | 0 | 0 | 37,96 | 16,2  | 10,51 | 23,6  | 62 | 23,64 | 7,23  | 1,70 |                              |
| FLU-123     | 2018       | 5  | 1 | 1 | 2 | 23 | 1 | 1 | 1 | 2 | 0 | 0 | 1 | 4 | 2 | 1 | 1 | 1 | 4 | 4 | 2 | 0 | 0 | 55,63 | 21,44 | 11,91 | 32,16 | 58 | 31,79 | 11,82 | 1,87 |                              |
| FLU-124     | 2018       | 15 | 1 | 1 | 2 | 24 | 1 | 1 | 1 | 3 | 0 | 5 | 4 | 0 | 0 | 0 | 2 | 2 | 4 | 3 | 2 | 0 | 1 | 51,18 | 20,34 | 11,16 | 0     | 0  |       |       |      |                              |





|                                    |      |    |   |   |   |    |   |   |   |   |   |   |   |   |   |   |   |   |   |   |   |   |   |       |       |       |       |     |       |       |      |  |
|------------------------------------|------|----|---|---|---|----|---|---|---|---|---|---|---|---|---|---|---|---|---|---|---|---|---|-------|-------|-------|-------|-----|-------|-------|------|--|
| FLU-94                             | 2015 | 6  | 1 | 1 | 4 | 15 | 1 | 1 | 1 | 3 | 0 | 5 | 4 | 1 | 1 | 2 | 1 | 1 | 2 | 3 | 1 | 0 | 1 | 56,8  | 23    | 12,7  | 0     | 0   |       |       |      |  |
| FLU-95                             | 2015 | 2  | 1 | 1 | 4 | 15 | 1 | 1 | 1 | 2 | 0 | 3 | 2 | 2 | 2 | 2 | 1 | 3 | 3 | 4 | 3 | 0 | 2 | 61,4  | 21,8  | 10,4  | 44    | 72  |       |       |      |  |
| FLU-96                             | 2018 | 5  | 1 | 1 | 4 | 16 | 1 | 1 | 1 | 2 | 3 | 0 | 1 | 1 | 2 | 2 | 0 | 1 | 2 | 1 | 1 | 0 | 0 | 63,6  | 17,4  | 11,4  | 31,8  | 50  |       |       |      |  |
| FLU-97                             | 2018 | 5  | 1 | 1 | 4 | 16 | 1 | 1 | 1 | 1 | 0 | 0 | 1 | 1 | 1 | 2 | 0 | 1 | 1 | 1 | 2 | 0 | 0 | 68,8  | 20,4  | 10    | 41,6  | 60  | 40,37 | 10,84 | 1,73 |  |
| FLU-98                             | 2018 | 2  | 1 | 1 | 4 | 16 | 1 | 2 | 1 | 1 | 0 | 1 | 2 | 1 | 1 | 2 | 0 | 0 | 0 | 1 | 1 | 0 | 3 | 49,6  | 15,2  | 10,4  | 8,3   | 17  |       |       |      |  |
| FLU-98-CF2                         | 2018 | 2  | 1 | 1 | 4 | 16 | 1 | 2 | 1 | 2 | 1 | 3 | 2 | 0 | 0 | 0 | 0 | 1 | 3 | 1 | 1 | 0 | 2 | 49,6  | 15,2  | 10,4  | 33    | 67  |       |       |      |  |
| 5 indirect percussion using antler |      |    |   |   |   |    |   |   |   |   |   |   |   |   |   |   |   |   |   |   |   |   |   |       |       |       |       |     |       |       |      |  |
| FLU-99                             | 2015 | 1  | 0 | 1 | 5 | 4  | 5 | 1 | 1 | 5 | 0 | 4 | 4 | 1 | 2 | 2 | 1 | 1 | 1 | 1 | 1 | 0 | 1 | 40    | 19,4  | 8,34  | 0     | 0   |       |       |      |  |
| FLU-100                            | 2015 | 7  | 1 | 1 | 5 | 4  | 5 | 1 | 1 | 3 | 0 | 4 | 4 | 1 | 3 | 2 | 1 | 0 | 0 | 1 | 1 | 0 | 0 | 50,3  | 21,2  | 6     | 50,1  | 100 | 49,04 | 11,06 | 1,90 |  |
| FLU-142                            | 2018 | 15 | 1 | 1 | 5 | 28 | 5 | 2 | 2 | 1 | 0 | 0 | 1 | 1 | 3 | 2 | 1 | 0 | 0 | 1 | 2 | 0 | 0 | 50,9  | 22,14 | 9,8   | 29,16 | 57  | 29,17 | 9,64  | 2,14 |  |
| FLU-142-CF2                        | 2018 | 15 | 1 | 1 | 5 | 28 | 5 | 2 | 2 | 1 | 0 | 0 | 1 | 2 | 2 | 1 | 1 | 0 | 0 | 1 | 1 | 0 | 0 | 50,9  | 22,14 | 9,8   | 28,89 | 57  | 29,00 | 9,07  | 1,89 |  |
| FLU-143                            | 2018 | 12 | 1 | 1 | 5 | 28 | 5 | 1 | 1 | 3 | 0 | 4 | 3 | 2 | 2 | 1 | 1 | 2 | 4 | 1 | 1 | 0 | 1 | 47,69 | 15,65 | 8,14  | 0     | 0   |       |       |      |  |
| FLU-144                            | 2018 | 6  | 1 | 1 | 5 | 28 | 5 | 2 | 2 | 1 | 0 | 0 | 1 | 2 | 3 | 2 | 1 | 0 | 0 | 2 | 1 | 0 | 0 | 59,61 | 17,11 | 8,02  | 24,33 | 41  | 24,33 | 9,70  | 1,77 |  |
| FLU-144-CF2                        | 2018 | 6  | 1 | 1 | 5 | 28 | 5 | 2 | 2 | 5 | 0 | 0 | 1 | 1 | 2 | 1 | 1 | 1 | 4 | 1 | 1 | 0 | 0 | 59,61 | 17,11 | 8,02  | 59,61 | 100 | 60,00 | 10,63 | 2,56 |  |
| FLU-145                            | 2018 | 18 | 0 | 1 | 5 | 28 | 5 | 1 | 1 | 2 | 0 | 3 | 2 | 1 | 1 | 1 | 2 | 1 | 4 | 1 | 2 | 1 | 0 | 45,19 | 14,42 | 9,73  | 28,38 | 63  | 28,38 | 7,94  | 2,23 |  |
| FLU-146                            | 2018 | 19 | 1 | 1 | 5 | 28 | 5 | 1 | 1 | 1 | 0 | 0 | 1 | 2 | 1 | 2 | 1 | 1 | 2 | 2 | 1 | 0 | 0 | 52,02 | 17,06 | 8,99  | 44,52 | 86  | 44,52 | 10,96 | 2,65 |  |
| FLU-147                            | 2018 | 8  | 1 | 1 | 5 | 28 | 5 | 1 | 1 | 5 | 0 | 0 | 1 | 2 | 2 | 2 | 1 | 1 | 4 | 1 | 2 | 0 | 0 | 64,14 | 19,94 | 13,11 | 64,14 | 100 | 64,10 | 13,95 | 3,06 |  |
| FLU-148                            | 2018 | 5  | 1 | 1 | 5 | 28 | 5 | 1 | 1 | 2 | 0 | 5 | 4 | 2 | 2 | 2 | 1 | 0 | 0 | 1 | 1 | 0 | 1 | 56,76 | 18,32 | 8,55  | 0     | 0   |       |       |      |  |
| FLU-149                            | 2018 | 5  | 1 | 1 | 5 | 28 | 5 | 1 | 1 | 5 | 0 | 5 | 4 | 2 | 3 | 1 | 1 | 1 | 3 | 1 | 1 | 0 | 1 | 57,95 | 17,43 | 7,74  | 0     | 0   |       |       |      |  |
| FLU-150                            | 2018 | 6  | 1 | 1 | 5 | 28 | 5 | 1 | 1 | 1 | 0 | 5 | 4 | 2 | 2 | 2 | 1 | 0 | 0 | 1 | 1 | 0 | 1 | 51,11 | 19,38 | 11,6  | 0     | 0   |       |       |      |  |
| FLU-151                            | 2018 | 3  | 1 | 1 | 5 | 28 | 5 | 1 | 1 | 2 | 0 | 0 | 1 | 1 | 2 | 2 | 1 | 1 | 3 | 1 | 1 | 0 | 0 | 52,41 | 16,71 | 9,38  | 52,41 | 100 | 52,41 | 11,15 | 2,24 |  |
| FLU-152                            | 2018 | 5  | 1 | 1 | 5 | 28 | 5 | 1 | 1 | 2 | 0 | 0 | 1 | 1 | 2 | 2 | 1 | 1 | 3 | 1 | 1 | 0 | 0 | 51,84 | 16,45 | 7,05  | 51,84 | 100 | 51,80 | 10,36 | 2,98 |  |
| FLU-153                            | 2018 | 8  | 1 | 1 | 5 | 28 | 5 | 1 | 1 | 1 | 0 | 0 | 1 | 2 | 2 | 1 | 1 | 0 | 0 | 2 | 1 | 0 | 0 | 46,31 | 16,54 | 11,41 | 29,63 | 64  | 30,00 | 7,76  | 2,03 |  |
| FLU-154                            | 2018 | 5  | 1 | 1 | 5 | 28 | 5 | 1 | 1 | 8 | 0 | 4 | 3 | 2 | 2 | 1 | 1 | 1 | 4 | 1 | 2 | 0 | 0 | 54,08 | 16,12 | 10,76 | 54,08 | 100 | 54,00 | 10,15 | 2,79 |  |
| FLU-155                            | 2018 | 20 | 1 | 1 | 5 | 28 | 5 | 1 | 1 | 3 | 0 | 4 | 3 | 2 | 2 | 2 | 1 | 1 | 4 | 1 | 3 | 0 | 0 | 52,26 | 17,57 | 7,53  | 52,26 | 100 | 52,26 | 10,40 | 2,28 |  |
| FLU-156                            | 2018 | 5  | 1 | 1 | 5 | 28 | 5 | 1 | 1 | 4 | 0 | 5 | 4 | 2 | 2 | 2 | 1 | 0 | 0 | 1 | 1 | 0 | 1 | 53,17 | 11,86 | 9,53  | 0     | 0   |       |       |      |  |
| FLU-157                            | 2018 | 6  | 1 | 1 | 5 | 28 | 5 | 1 | 1 | 2 | 0 | 0 | 1 | 2 | 1 | 1 | 1 | 1 | 3 | 2 | 1 | 0 | 0 | 52,75 | 16,5  | 9,96  | 34,59 | 66  | 34,59 | 7,87  | 2,35 |  |
| FLU-158                            | 2018 | 5  | 1 | 1 | 5 | 28 | 5 | 1 | 1 | 1 | 0 | 0 | 1 | 2 | 2 | 2 | 1 | 1 | 4 | 1 | 1 | 0 | 0 | 57,65 | 18,71 | 10,58 | 56,1  | 97  | 56,10 | 10,34 | 2,54 |  |
| FLU-159                            | 2018 | 4  | 1 | 1 | 5 | 28 | 5 | 1 | 1 | 3 | 0 | 4 | 3 | 1 | 2 | 1 | 1 | 1 | 4 | 1 | 1 | 0 | 0 | 56,61 | 17,51 | 13,34 | 56,61 | 100 | 56,61 | 9,28  | 2,26 |  |
| FLU-160                            | 2018 | 1  | 1 | 1 | 5 | 28 | 5 | 1 | 1 | 3 | 0 | 3 | 2 | 2 | 2 | 1 | 1 | 1 | 3 | 1 | 1 | 0 | 0 | 75,37 | 16,9  | 12,44 | 40,07 | 53  | 40,07 | 10,18 | 2,75 |  |

**S3 Table (continued). Experimental corpus of fluted points used in this study.** Below, are explained the codes in S3\_Table

|                                                       |                                                                                                                                                                                                                                                                                                                                                                                                                                                                                                                                                                                                                                                                                                                                                                                                                                                                                                                                                                                                                                                                                                                                                                                                                                                                                                                                                                                                                                                                                                                                                                                                                                                                                                                               |
|-------------------------------------------------------|-------------------------------------------------------------------------------------------------------------------------------------------------------------------------------------------------------------------------------------------------------------------------------------------------------------------------------------------------------------------------------------------------------------------------------------------------------------------------------------------------------------------------------------------------------------------------------------------------------------------------------------------------------------------------------------------------------------------------------------------------------------------------------------------------------------------------------------------------------------------------------------------------------------------------------------------------------------------------------------------------------------------------------------------------------------------------------------------------------------------------------------------------------------------------------------------------------------------------------------------------------------------------------------------------------------------------------------------------------------------------------------------------------------------------------------------------------------------------------------------------------------------------------------------------------------------------------------------------------------------------------------------------------------------------------------------------------------------------------|
| Raw material (R.M.)                                   | 1. Eocene resinite opal (49), 2. Eocene flint (79), 3. Bajocian flint (16), 4. Eocene flint (86), 5. Turonian flint (37), 6. Turonian flint (17), 7. Coniacian flint (76), 8. Maastrichtian flint (24), 9. Cenomanian flint (76), 10. Chalcedony (29), 11. Turonian flint (16), 12. Bathonian flint (86), 13. Oligocene flint (30), 14. Miocene flint (41), 15. Bajocian-Bathonian flint (86), 16. Radiolarite (Masirah-Oman), 17. Chalcedony (Suhila-U.A.E), 18. Eocene flint (Shuwaymyah -Oman), 19. Eocene flint (Duqm - Oman), 20. Turonian flint (45)                                                                                                                                                                                                                                                                                                                                                                                                                                                                                                                                                                                                                                                                                                                                                                                                                                                                                                                                                                                                                                                                                                                                                                    |
| Heat treatment (H.T.)                                 | 0 heat treatment 1 no heat treatment                                                                                                                                                                                                                                                                                                                                                                                                                                                                                                                                                                                                                                                                                                                                                                                                                                                                                                                                                                                                                                                                                                                                                                                                                                                                                                                                                                                                                                                                                                                                                                                                                                                                                          |
| Shaping (Shap.)                                       | 1 direct soft hammer percussion and pressure 2 other                                                                                                                                                                                                                                                                                                                                                                                                                                                                                                                                                                                                                                                                                                                                                                                                                                                                                                                                                                                                                                                                                                                                                                                                                                                                                                                                                                                                                                                                                                                                                                                                                                                                          |
| Fluting technique (Fl. T)                             | 1 pressure 2 direct percussion using soft stone 3 direct percussion using antler 4 direct percussion using hard wood 5 indirect percussion using antler                                                                                                                                                                                                                                                                                                                                                                                                                                                                                                                                                                                                                                                                                                                                                                                                                                                                                                                                                                                                                                                                                                                                                                                                                                                                                                                                                                                                                                                                                                                                                                       |
| Tool                                                  | 1. Antler stick ( <i>Cervus elaphus</i> , 23 grams), 2. Short crutch with antler point ( <i>Cervus elaphus</i> , 170 grams), 3. antler tine ( <i>Cervus elaphus</i> , 73 grams), 4. Short antler curved punch ( <i>Cervus elaphus</i> , 30 grams) and hardwood hammer ( <i>Buxus sempervirens</i> , 300 grams), 5. Soft stone hammer (limestone, 150 grams), 6. Soft stone hammer (micritic limestone, 145 grams), 7. Soft stone hammer (micritic limestone, 245 grams), 8. Soft stone hammer (micritic limestone, 213 grams), 9. Soft stone hammer (fine limestone, 116 grams), 10. Soft stone hammer (trachyte, 128 grams), 11. Soft stone hammer (fine limestone, 184 grams), 12. Antler hammer ( <i>Odocoileus virginianus</i> , 240 grams), 13. Antler hammer ( <i>Alces alce</i> , 111 grams), 14. Antler hammer ( <i>Cervus elaphus</i> , 262 grams), 15. Hardwood Hammer ( <i>Buxus sempervirens</i> , 200 grams), 16. Hardwood hammer ( <i>Buxus sempervirens</i> , 290 grams), 17. Hardwood hammer ( <i>Buxus sempervirens</i> , 350 grams), 18. Hardwood hammer ( <i>Buxus sempervirens</i> , 450 grams), 19. Hardwood hammer ( <i>Cornus mas</i> , 285 grammes), 20. Hardwood hammer ( <i>Manilkara sp.</i> , 300 grams), 21. Soft stone hammer (marble, 224 grams), 22. Soft stone hammer (marble, 136 grams), 23. Soft stone hammer (soft sandstone, 114 grams), 24. Soft stone hammer (sandstone, 130 grams), 25. Antler hammer ( <i>Alces alce</i> , 190 grams), 26. Antler hammer ( <i>Alces alce</i> , 105 grams), 27. Antler hammer ( <i>Alces alce</i> , 66 grams), 28. Short antler straight punch ( <i>Capreolus Capreolus</i> , 25 grams) and hardwood hammer ( <i>Buxus sempervirens</i> , 245 grams) |
| Holding (Hold.)                                       | 1 free hand 2 free hand on wooden support 3 pressure Pelegrin mode 2 4 pressure small lever 5 wooden grooved support                                                                                                                                                                                                                                                                                                                                                                                                                                                                                                                                                                                                                                                                                                                                                                                                                                                                                                                                                                                                                                                                                                                                                                                                                                                                                                                                                                                                                                                                                                                                                                                                          |
| Fluting organisation flûtage (Fl. Org.)               | 1 unifacial unipolar 2 unifacial bipolar 3 unifacial unipolar multiple 4 unifacial bipolar multiple                                                                                                                                                                                                                                                                                                                                                                                                                                                                                                                                                                                                                                                                                                                                                                                                                                                                                                                                                                                                                                                                                                                                                                                                                                                                                                                                                                                                                                                                                                                                                                                                                           |
| Number of channel-flake (C-F nbr.)                    | n                                                                                                                                                                                                                                                                                                                                                                                                                                                                                                                                                                                                                                                                                                                                                                                                                                                                                                                                                                                                                                                                                                                                                                                                                                                                                                                                                                                                                                                                                                                                                                                                                                                                                                                             |
| Number of fragments (Fgts. nbr.)                      | 0 whole n number of fragments                                                                                                                                                                                                                                                                                                                                                                                                                                                                                                                                                                                                                                                                                                                                                                                                                                                                                                                                                                                                                                                                                                                                                                                                                                                                                                                                                                                                                                                                                                                                                                                                                                                                                                 |
| Lack of parts (Lack)                                  | 0 none 1 proximal 2 mesial 3 distal 4 multiple                                                                                                                                                                                                                                                                                                                                                                                                                                                                                                                                                                                                                                                                                                                                                                                                                                                                                                                                                                                                                                                                                                                                                                                                                                                                                                                                                                                                                                                                                                                                                                                                                                                                                |
| Channel-flake accidents (C-F Acc.)                    | 0 none 1 hinged proximal 2 hinged mesial 3 hinged distal 4 slight distal plunging 5 major plunging 6 edge pulling 7 double flaking                                                                                                                                                                                                                                                                                                                                                                                                                                                                                                                                                                                                                                                                                                                                                                                                                                                                                                                                                                                                                                                                                                                                                                                                                                                                                                                                                                                                                                                                                                                                                                                            |
| Channel-flake distal profile (C-F dist. prof.)        | 1 normal 2 hinged 3 slightly plunged 4 plunged 5 overthickness and distal enlargement                                                                                                                                                                                                                                                                                                                                                                                                                                                                                                                                                                                                                                                                                                                                                                                                                                                                                                                                                                                                                                                                                                                                                                                                                                                                                                                                                                                                                                                                                                                                                                                                                                         |
| Butt (facetted-convex-abraded)                        | 0 unobservable 1 narrow 2 large 3 punctiform 4 linear                                                                                                                                                                                                                                                                                                                                                                                                                                                                                                                                                                                                                                                                                                                                                                                                                                                                                                                                                                                                                                                                                                                                                                                                                                                                                                                                                                                                                                                                                                                                                                                                                                                                         |
| Bulb                                                  | 0 unobservable 1 almost nonexistent 2 slightly pronounced 3 pronounced                                                                                                                                                                                                                                                                                                                                                                                                                                                                                                                                                                                                                                                                                                                                                                                                                                                                                                                                                                                                                                                                                                                                                                                                                                                                                                                                                                                                                                                                                                                                                                                                                                                        |
| Lip                                                   | 0 unobservable 1 absent 2 present 3 developed                                                                                                                                                                                                                                                                                                                                                                                                                                                                                                                                                                                                                                                                                                                                                                                                                                                                                                                                                                                                                                                                                                                                                                                                                                                                                                                                                                                                                                                                                                                                                                                                                                                                                 |
| Bulb scars (Bb. sc.)                                  | 0 unobservable 1 absent 2 present                                                                                                                                                                                                                                                                                                                                                                                                                                                                                                                                                                                                                                                                                                                                                                                                                                                                                                                                                                                                                                                                                                                                                                                                                                                                                                                                                                                                                                                                                                                                                                                                                                                                                             |
| Ripples amplitude on channel-flake (Rip. Am. C-F)     | 0 absent 1 very light 2 pronounced 3 well pronounced                                                                                                                                                                                                                                                                                                                                                                                                                                                                                                                                                                                                                                                                                                                                                                                                                                                                                                                                                                                                                                                                                                                                                                                                                                                                                                                                                                                                                                                                                                                                                                                                                                                                          |
| Ripples localisation on channel-flake (Rip. Loc. C-F) | 0 absent 1 proximal part 2 mesial part 3 distal part 4 mesial and distal part                                                                                                                                                                                                                                                                                                                                                                                                                                                                                                                                                                                                                                                                                                                                                                                                                                                                                                                                                                                                                                                                                                                                                                                                                                                                                                                                                                                                                                                                                                                                                                                                                                                 |
| Edges parallelism on channel-flake (Edg. Par. C-F)    | 1 parallel 2 convergent 3 divergent 4 divergent 2/3 and convergent distal end                                                                                                                                                                                                                                                                                                                                                                                                                                                                                                                                                                                                                                                                                                                                                                                                                                                                                                                                                                                                                                                                                                                                                                                                                                                                                                                                                                                                                                                                                                                                                                                                                                                 |
| Edges regularity on channel-flake (Edg. Reg. CF)      | 1 straight 2 sinuous 3 irregular                                                                                                                                                                                                                                                                                                                                                                                                                                                                                                                                                                                                                                                                                                                                                                                                                                                                                                                                                                                                                                                                                                                                                                                                                                                                                                                                                                                                                                                                                                                                                                                                                                                                                              |
| Channel-flake overflowing (C-F ov.fl.)                | 0 non overflowing 1 overflowing one side 2 overflowing two sides                                                                                                                                                                                                                                                                                                                                                                                                                                                                                                                                                                                                                                                                                                                                                                                                                                                                                                                                                                                                                                                                                                                                                                                                                                                                                                                                                                                                                                                                                                                                                                                                                                                              |
| Fluted piece accidents (F.P Acc.)                     | 0 no prohibitive accidents 1 plunging fracture 2 major hinged fracture simple 3 major hinged fracture double 4 distal counterblow 5 flexion breakage 6 plunging and flexion breakage 7 hinged and distal counterblow                                                                                                                                                                                                                                                                                                                                                                                                                                                                                                                                                                                                                                                                                                                                                                                                                                                                                                                                                                                                                                                                                                                                                                                                                                                                                                                                                                                                                                                                                                          |
| Maximum length fluted piece (l. F.P) - mm             | n mm                                                                                                                                                                                                                                                                                                                                                                                                                                                                                                                                                                                                                                                                                                                                                                                                                                                                                                                                                                                                                                                                                                                                                                                                                                                                                                                                                                                                                                                                                                                                                                                                                                                                                                                          |
| Maximum width fluted piece (w. F.P) - mm              | n mm                                                                                                                                                                                                                                                                                                                                                                                                                                                                                                                                                                                                                                                                                                                                                                                                                                                                                                                                                                                                                                                                                                                                                                                                                                                                                                                                                                                                                                                                                                                                                                                                                                                                                                                          |
| Maximum thickness fluted piece (th. F.P) - mm         | n mm                                                                                                                                                                                                                                                                                                                                                                                                                                                                                                                                                                                                                                                                                                                                                                                                                                                                                                                                                                                                                                                                                                                                                                                                                                                                                                                                                                                                                                                                                                                                                                                                                                                                                                                          |
| Fluting length (Fl. l.) - mm                          | n mm                                                                                                                                                                                                                                                                                                                                                                                                                                                                                                                                                                                                                                                                                                                                                                                                                                                                                                                                                                                                                                                                                                                                                                                                                                                                                                                                                                                                                                                                                                                                                                                                                                                                                                                          |
| % fluted length ((Fl. l./l. F.P)x100)                 | n%                                                                                                                                                                                                                                                                                                                                                                                                                                                                                                                                                                                                                                                                                                                                                                                                                                                                                                                                                                                                                                                                                                                                                                                                                                                                                                                                                                                                                                                                                                                                                                                                                                                                                                                            |
| Maximum length channel-flake (l. C-F) - mm            | n mm                                                                                                                                                                                                                                                                                                                                                                                                                                                                                                                                                                                                                                                                                                                                                                                                                                                                                                                                                                                                                                                                                                                                                                                                                                                                                                                                                                                                                                                                                                                                                                                                                                                                                                                          |
| Maximum width channel-flake (L. C-F)- mm              | n mm                                                                                                                                                                                                                                                                                                                                                                                                                                                                                                                                                                                                                                                                                                                                                                                                                                                                                                                                                                                                                                                                                                                                                                                                                                                                                                                                                                                                                                                                                                                                                                                                                                                                                                                          |
| Maximum thickness channel-flake (Ep. C-F) - mm        | n mm                                                                                                                                                                                                                                                                                                                                                                                                                                                                                                                                                                                                                                                                                                                                                                                                                                                                                                                                                                                                                                                                                                                                                                                                                                                                                                                                                                                                                                                                                                                                                                                                                                                                                                                          |
| Observations - remarks                                |                                                                                                                                                                                                                                                                                                                                                                                                                                                                                                                                                                                                                                                                                                                                                                                                                                                                                                                                                                                                                                                                                                                                                                                                                                                                                                                                                                                                                                                                                                                                                                                                                                                                                                                               |
